# Supplementary material for: A greener approach for the synthesis of 3-cyanoacetamide pyrrole catalyzed by amorphous carbon-supported sulfonic acid
Source: Royal Society of Chemistry journal article supplement (doi:10.1039/d3nj01948a), 2023-01-01

## Supporting information

for

### A greener approach for the synthesis of 3-cyanoacetamide pyrrole catalyzed by amorphous carbon-supported sulfonic acid

Hai Truong Nguyen,<sup>a,b</sup> Tan Van Le,<sup>a,b</sup> Phat Ngoc Nguyen,<sup>a,b</sup> Khanh Ha Nguyen,<sup>a,b</sup> Linh  
Ho Thuy Nguyen,<sup>b,c</sup> Tan Le Hoang Doan,<sup>b,c</sup> and Phuong Hoang Tran<sup>a,b\*</sup>

<sup>a</sup> Department of Organic Chemistry, Faculty of Chemistry, University of Science, Vietnam  
National University, Ho Chi Minh City 700000, Viet Nam.

Email: [thphuong@hcmus.edu.vn](mailto:thphuong@hcmus.edu.vn), Phone number: +84903706762

<sup>b</sup> Vietnam National University, Ho Chi Minh City 700000, Viet Nam.

<sup>c</sup> Center for Innovative Materials and Architectures, Ho Chi Minh City 700000, Viet Nam.

## Table of contents

|                                                                         |        |
|-------------------------------------------------------------------------|--------|
| <b>Section S1.</b> Control experiments                                  | S2     |
| <b>Section S2.</b> <sup>1</sup> H, and <sup>13</sup> C NMR spectroscopy | S2-S18 |

## Section S1. Control experiments

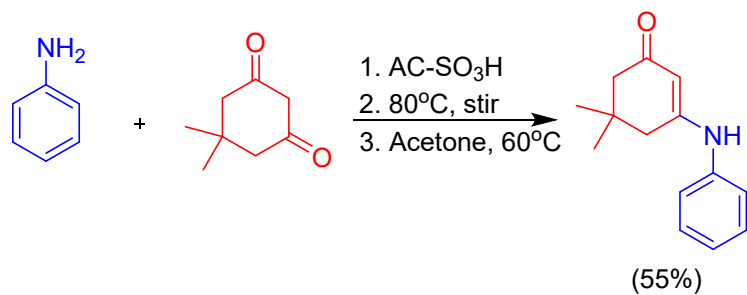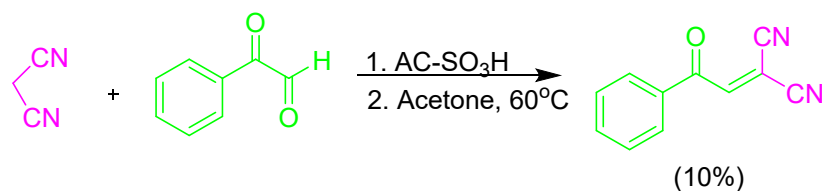

## Section S2. Spectral data

<sup>1</sup>H, <sup>13</sup>C NMR spectrum and HRMS of 2-Cyano-2-(6,6-dimethyl-4-oxo-1,2-diphenyl-4,5,6,7-tetrahydro-1H-indol-3-yl)acetamide (1a)

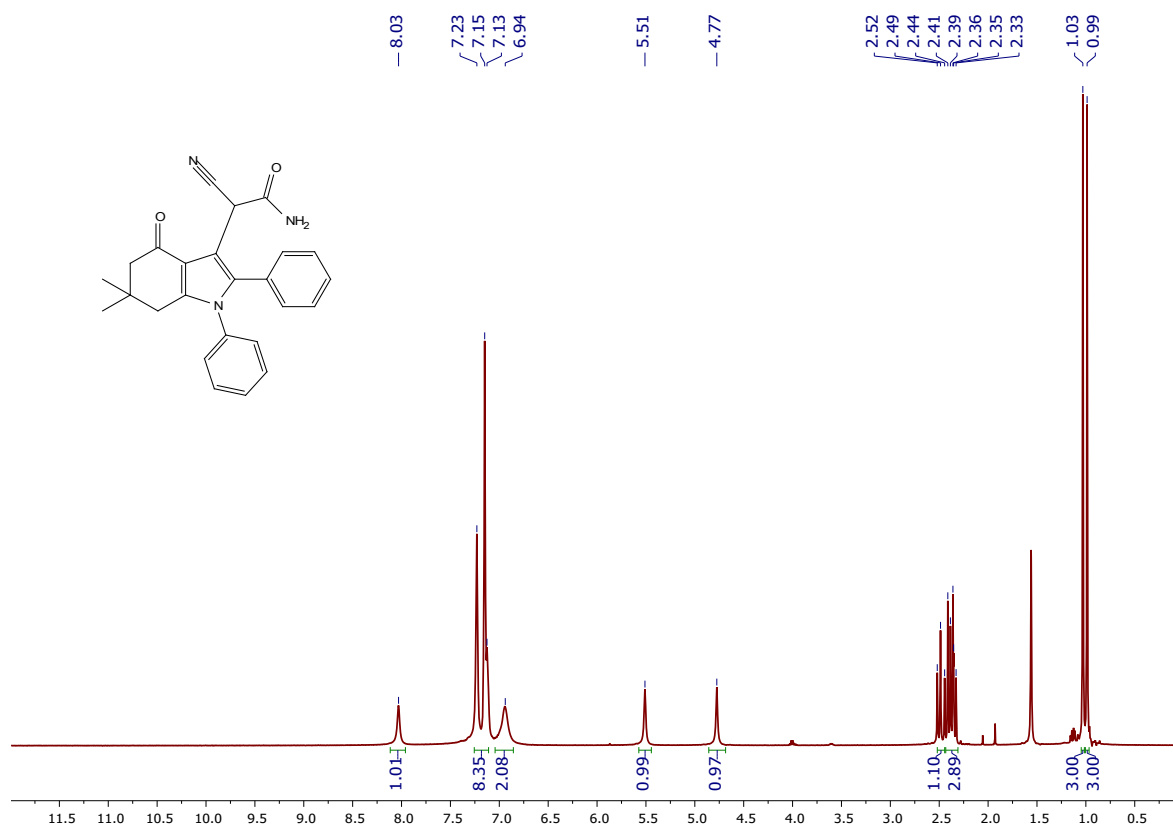

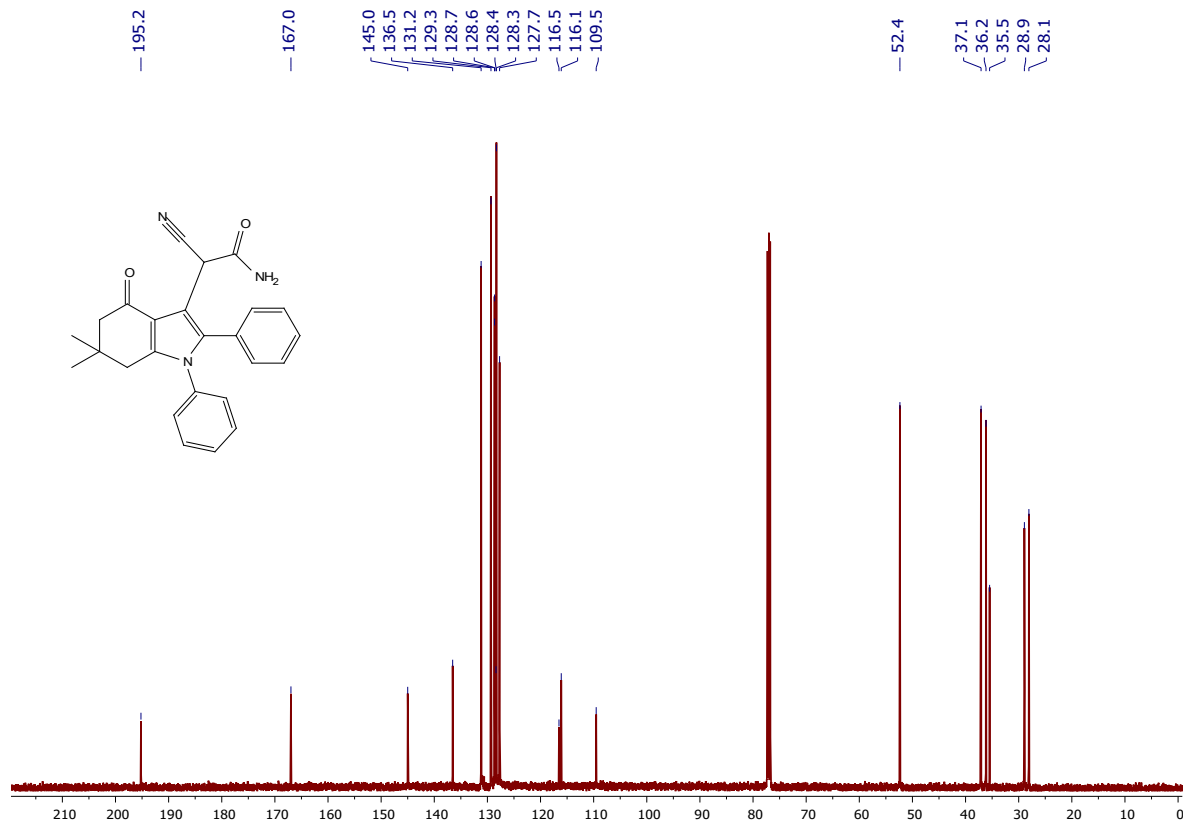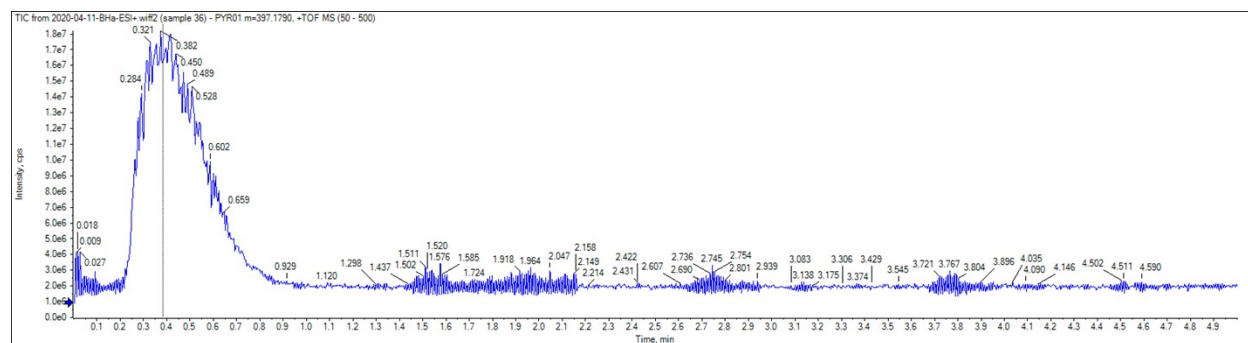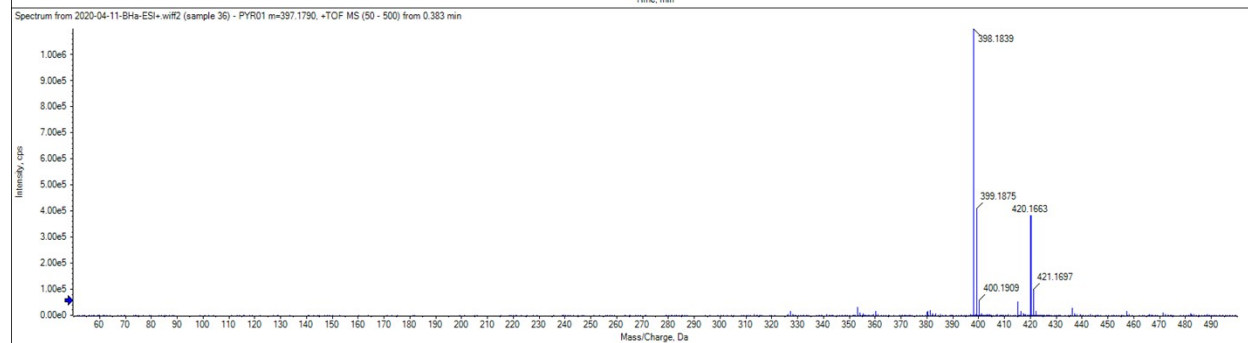

**$^1\text{H}$ ,  $^{13}\text{C}$  NMR spectrum of 2-Cyano-2-(6,6-dimethyl-4-oxo-2-phenyl-1-(*o*-tolyl)-4,5,6,7-tetrahydro-1*H*-indol-3-yl)acetamide (2a)**

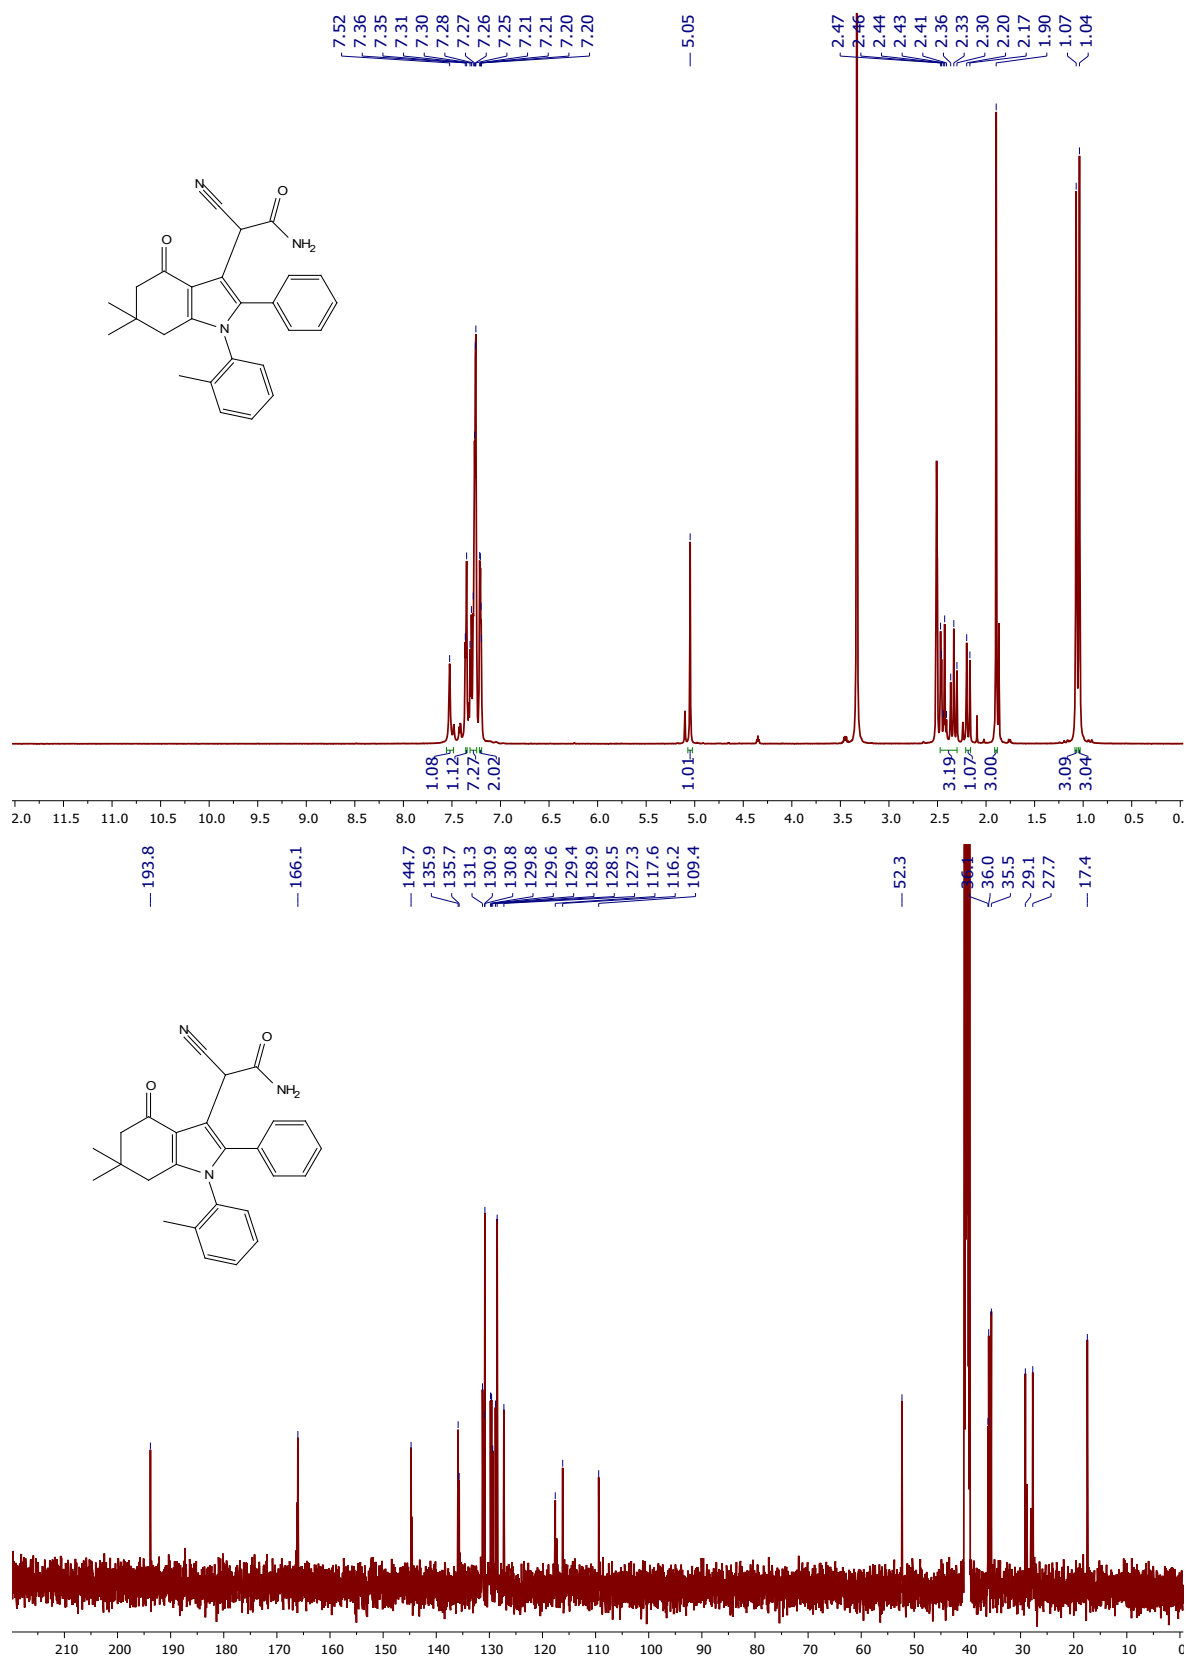

**$^1\text{H}$ ,  $^{13}\text{C}$  NMR spectrum of 2-Cyano-2-(6,6-dimethyl-4-oxo-2-phenyl-1-(*p*-tolyl)-4,5,6,7-tetrahydro-1*H*-indol-3-yl)acetamide (3a)**

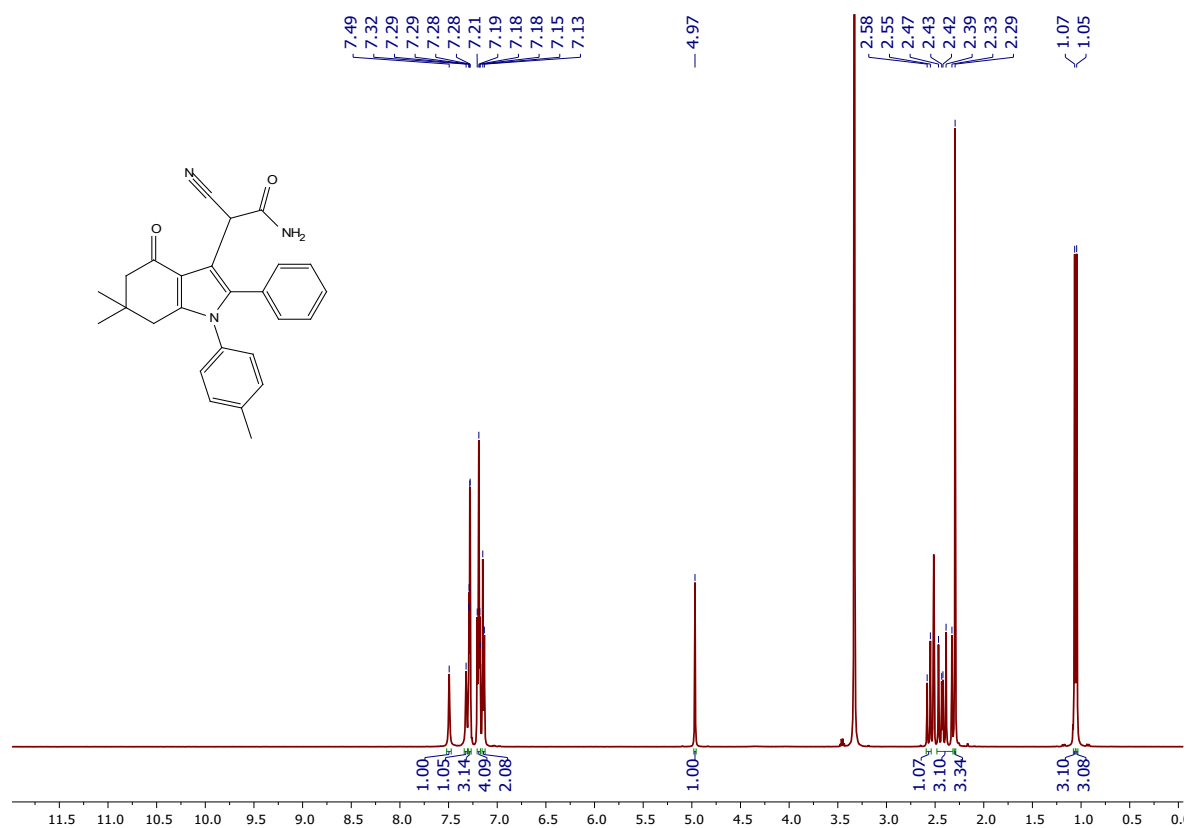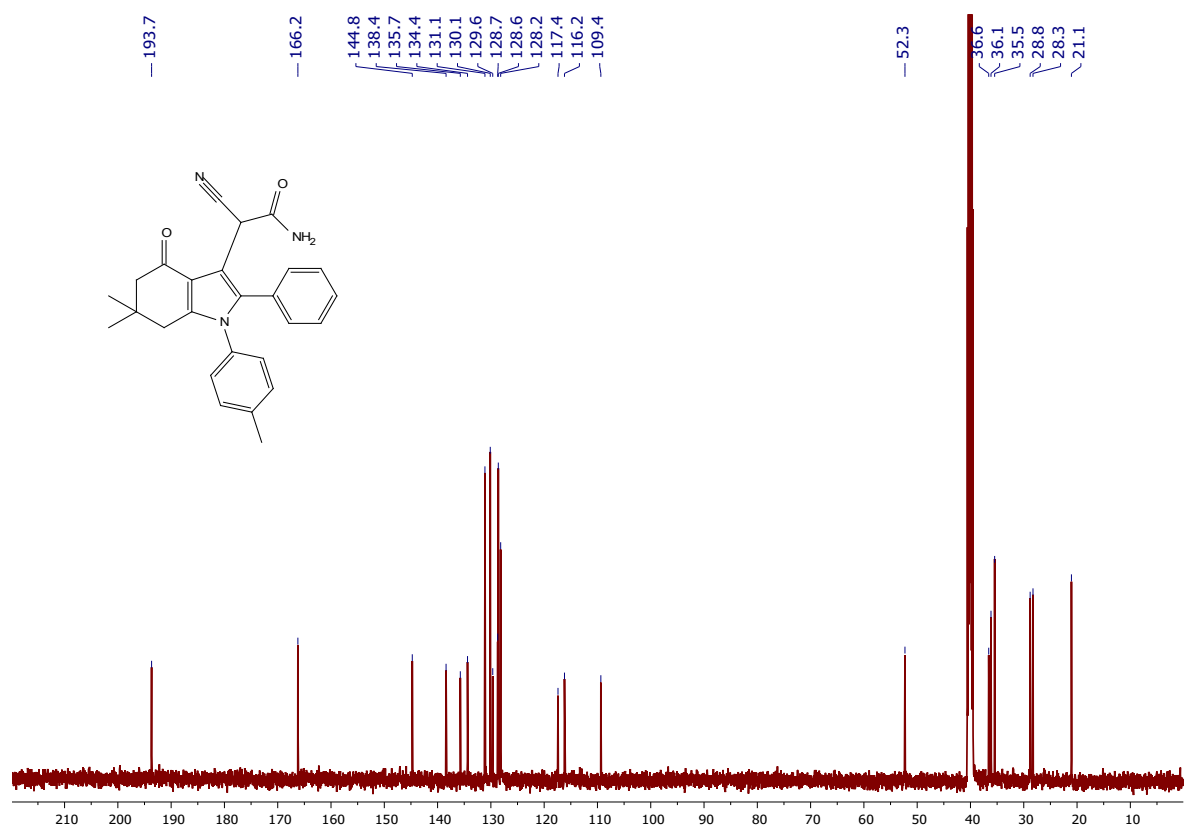

**$^1\text{H}$ ,  $^{13}\text{C}$  NMR spectrum of 2-(1-(4-Bromophenyl)-6,6-dimethyl-4-oxo-2-phenyl-4,5,6,7-tetrahydro-1*H*-indol-3-yl)-2-cyanoacetamide (4a)**

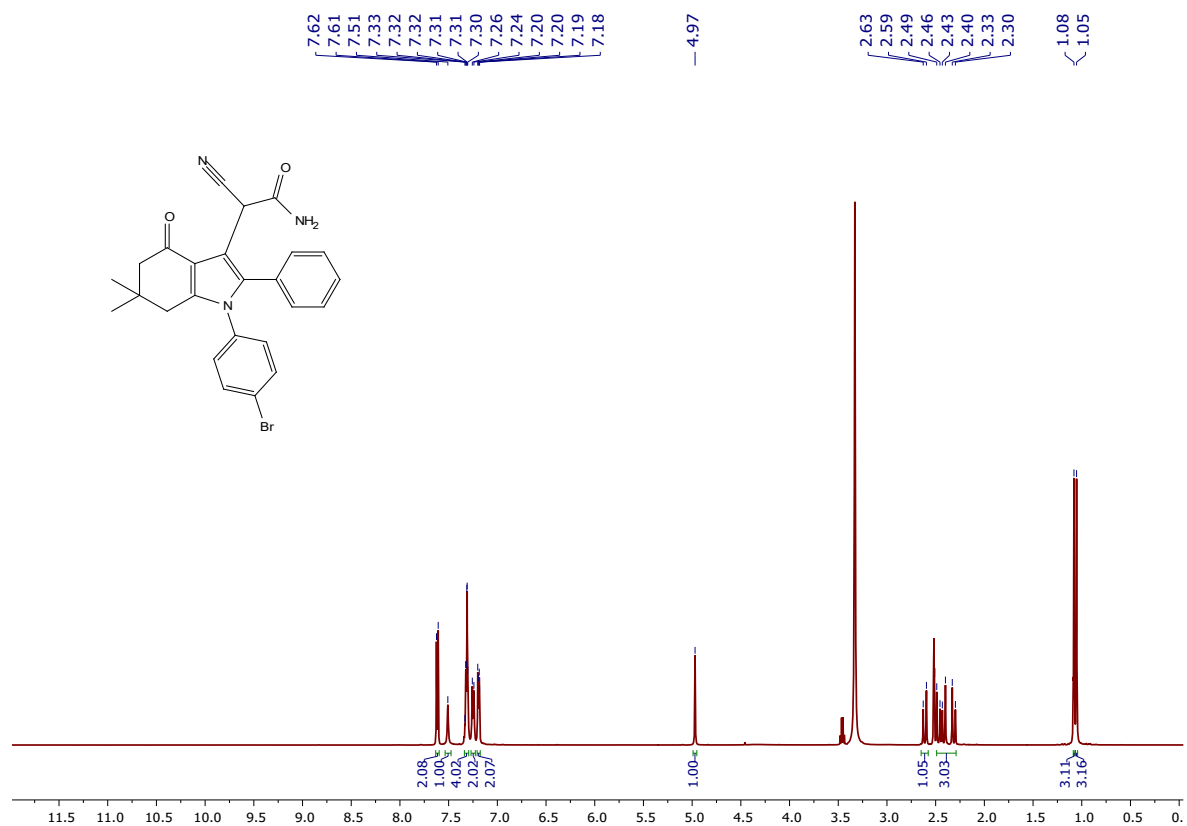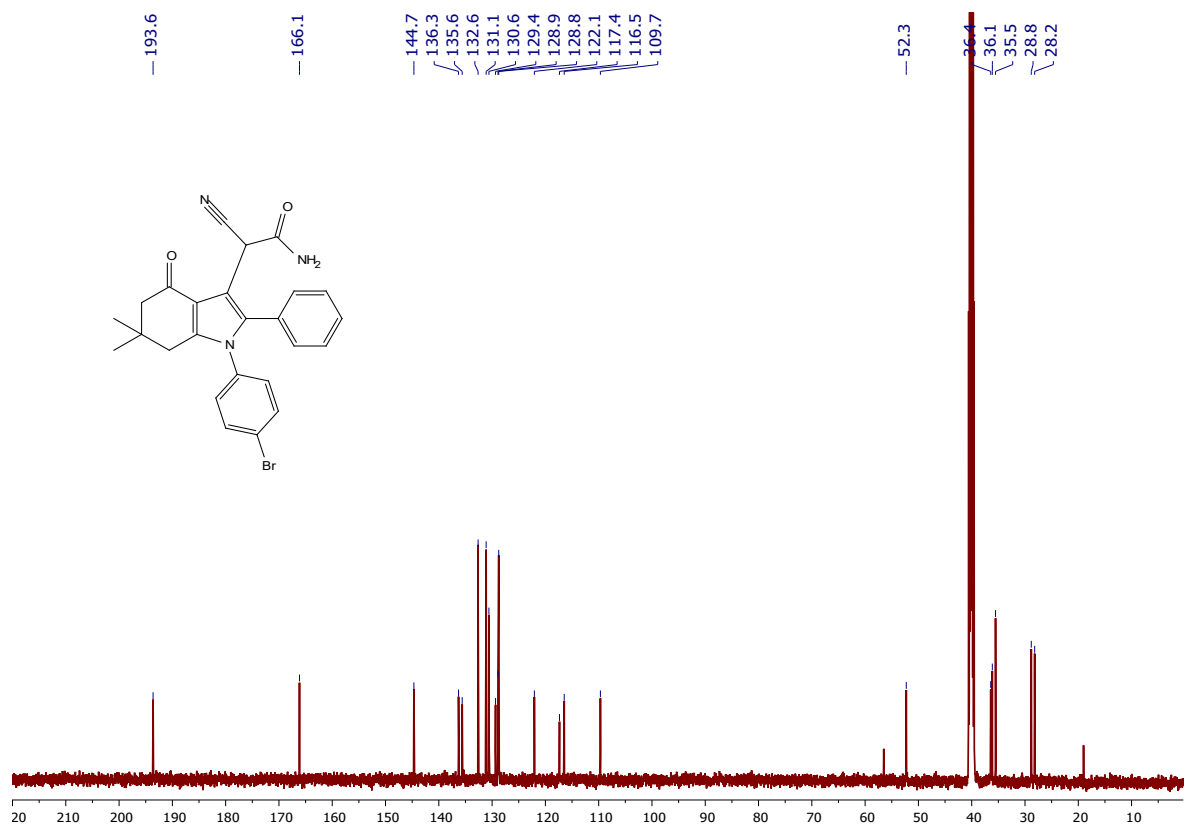

**$^1\text{H}$ ,  $^{13}\text{C}$  NMR spectrum of 2-Cyano-2-(1-(4-methoxyphenyl)-6,6-dimethyl-4-oxo-2-phenyl-4,5,6,7-tetrahydro-1*H*-indol-3-yl)acetamide (5a).**

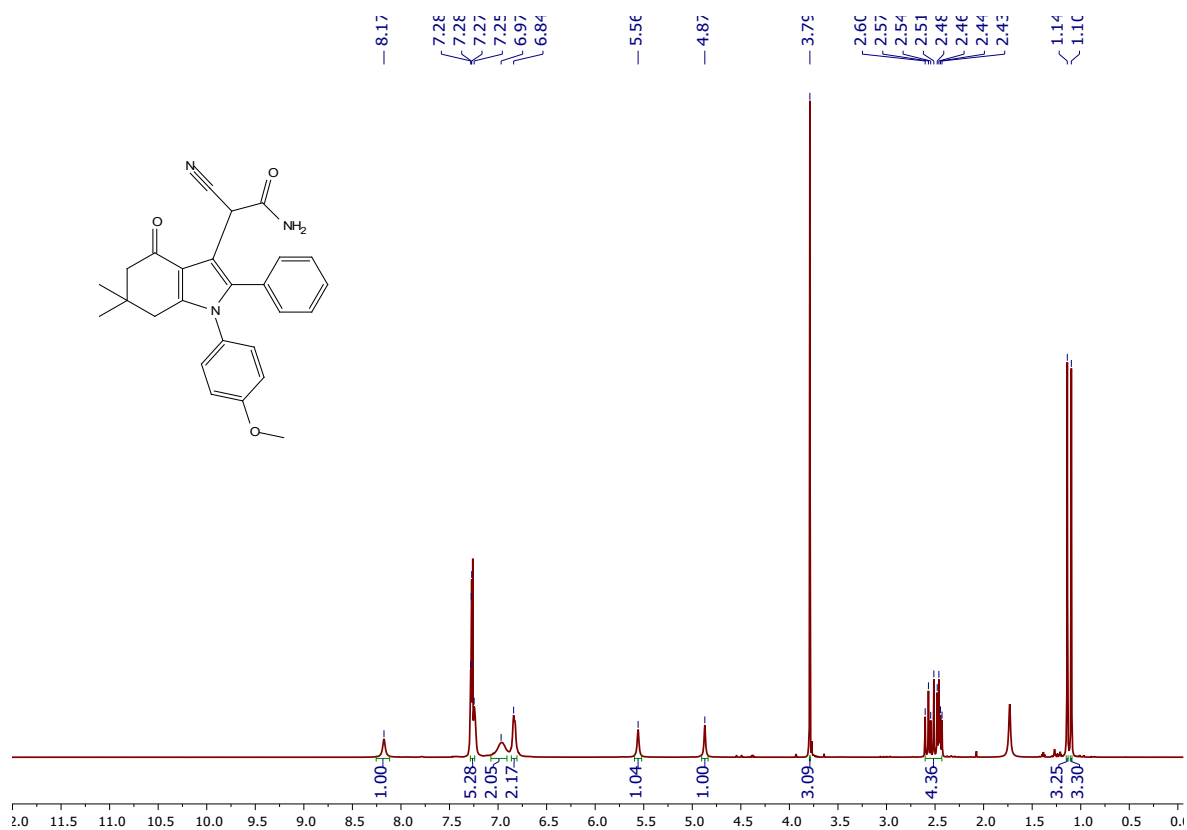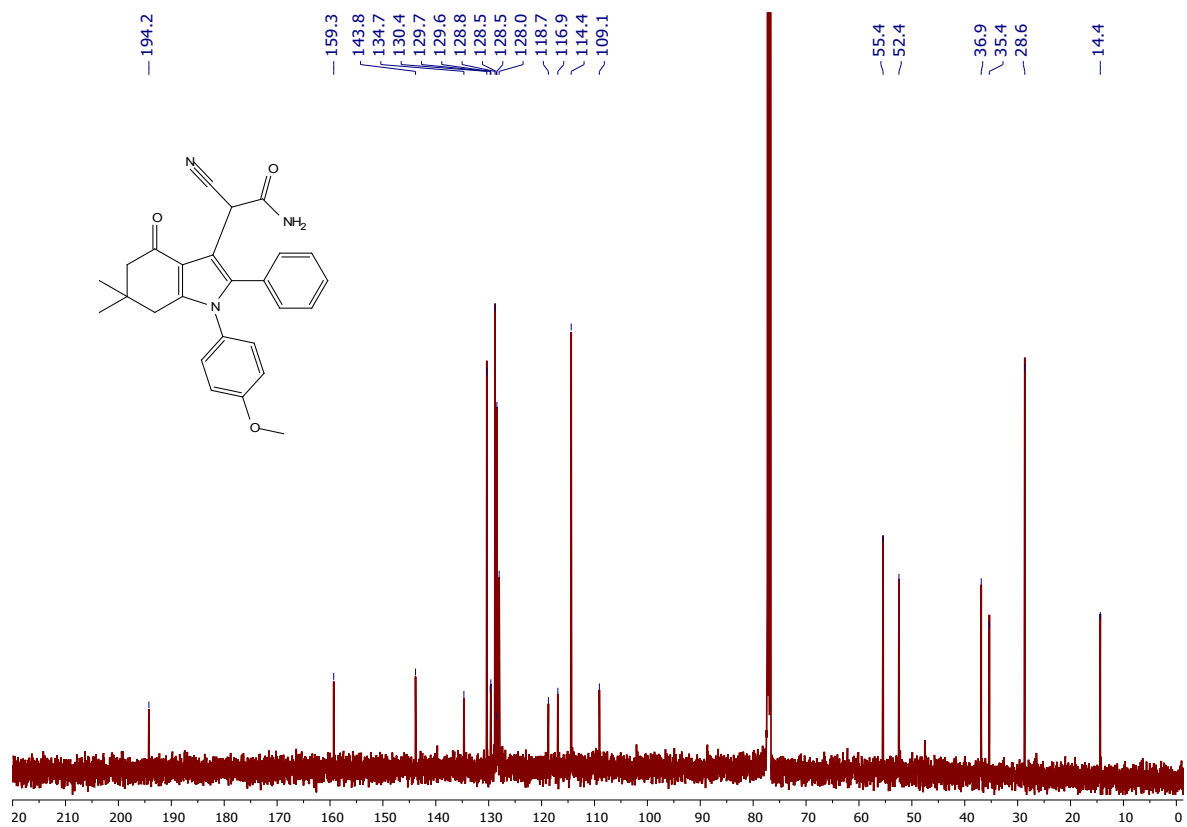

**$^1\text{H}$ ,  $^{13}\text{C}$  NMR spectrum of 2-Cyano-2-(1-(3,4-dichlorophenyl)-6,6-dimethyl-4-oxo-2-phenyl-4,5,6,7-tetrahydro-1*H*-indol-3-yl)acetamide (6a)**

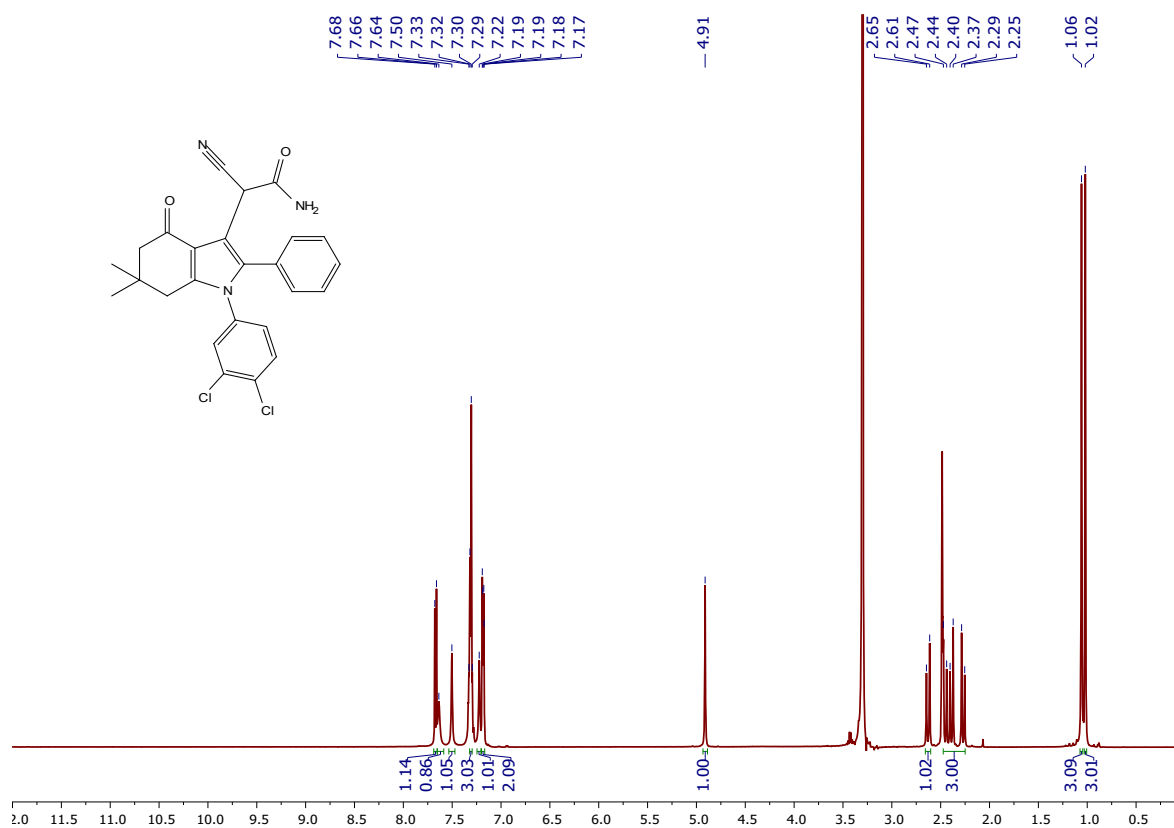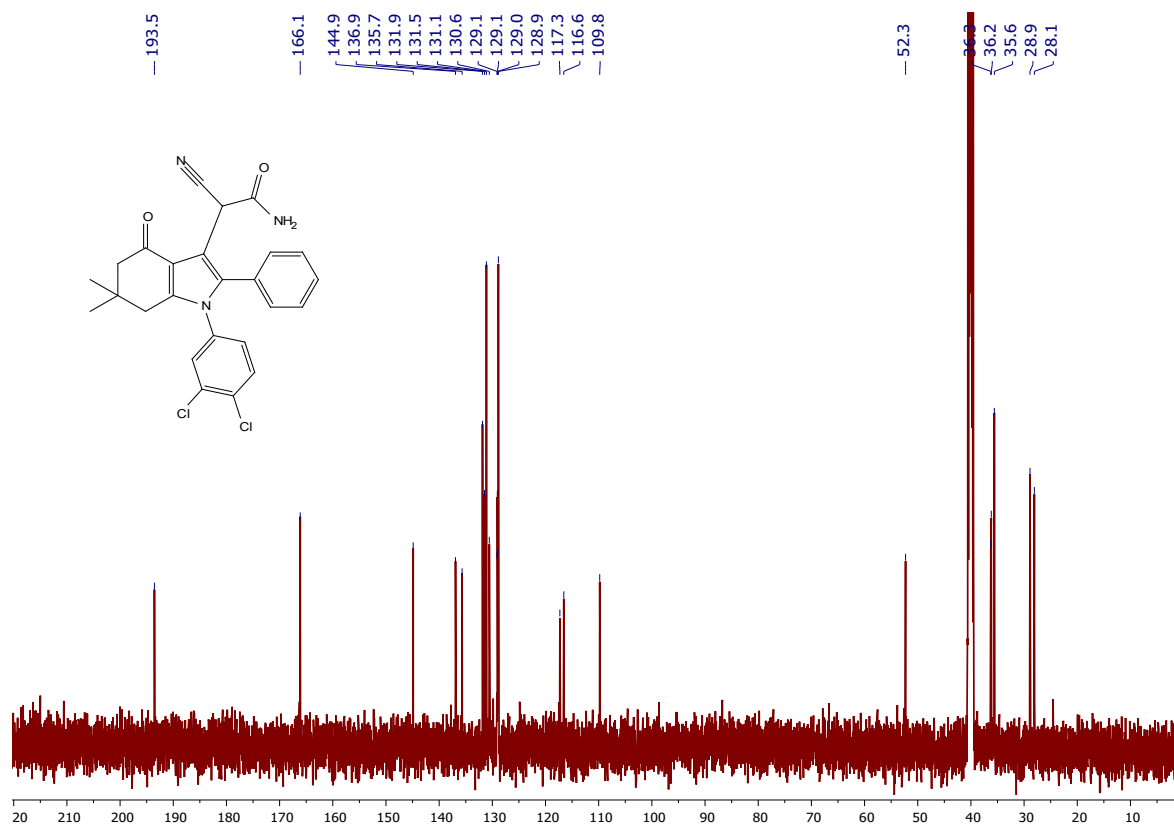



**$^1\text{H}$ ,  $^{13}\text{C}$  NMR spectrum of 2-(1-(1*H*-Benzo[*d*]imidazol-2-yl)-6,6-dimethyl-4-oxo-2-phenyl-4,5,6,7-tetrahydro-1*H*-indol-3-yl)-2-cyanoacetamide (7a)**

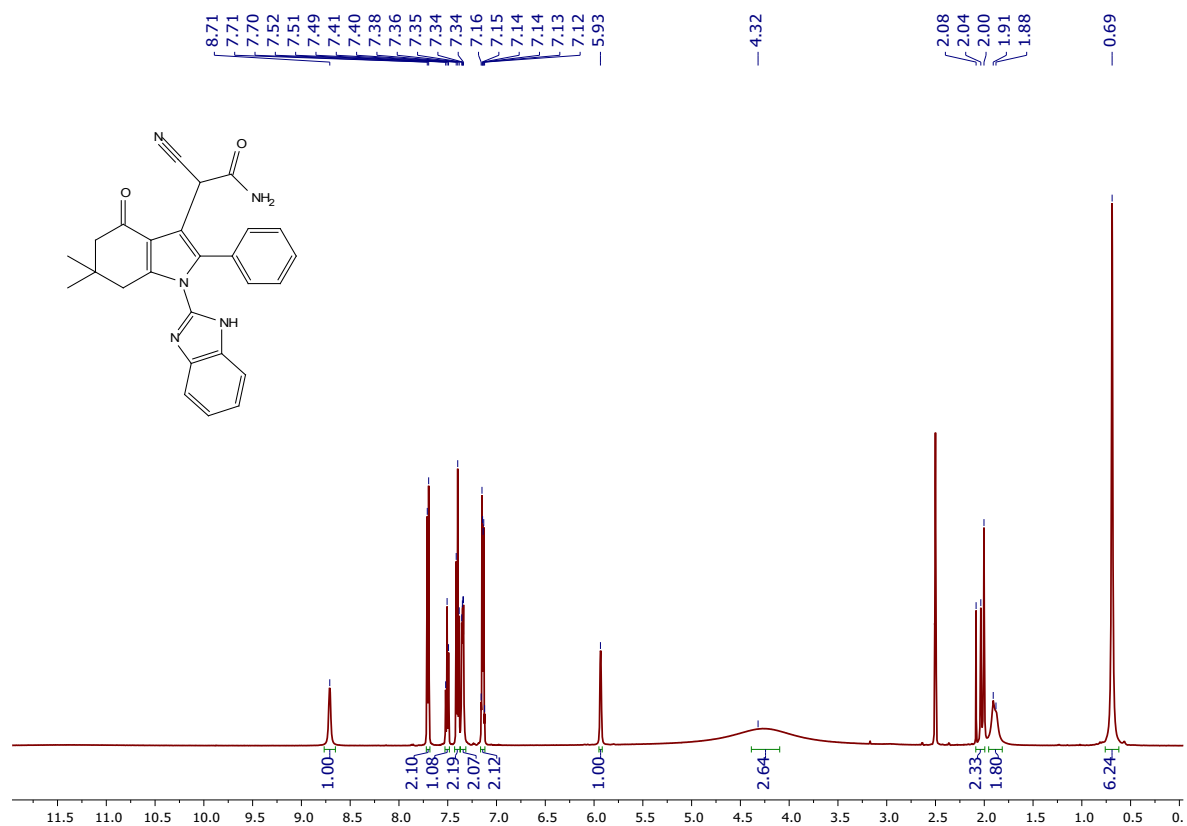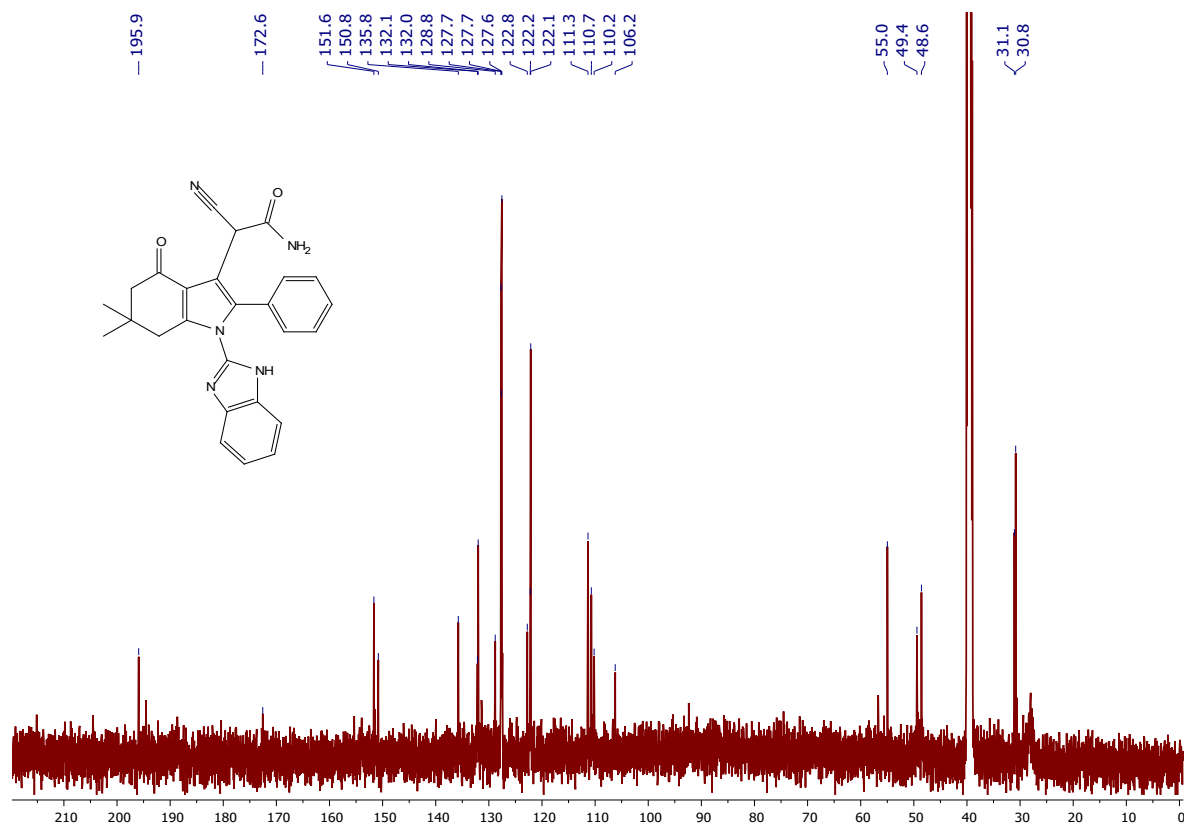

**$^1\text{H}$ ,  $^{13}\text{C}$  NMR spectrum of 2-(4,7-Dichloro-2-phenyl-1*H*-indol-3-yl)-3-hydroxy-5,5-dimethylcyclohex-2-en-1-one (8c).**

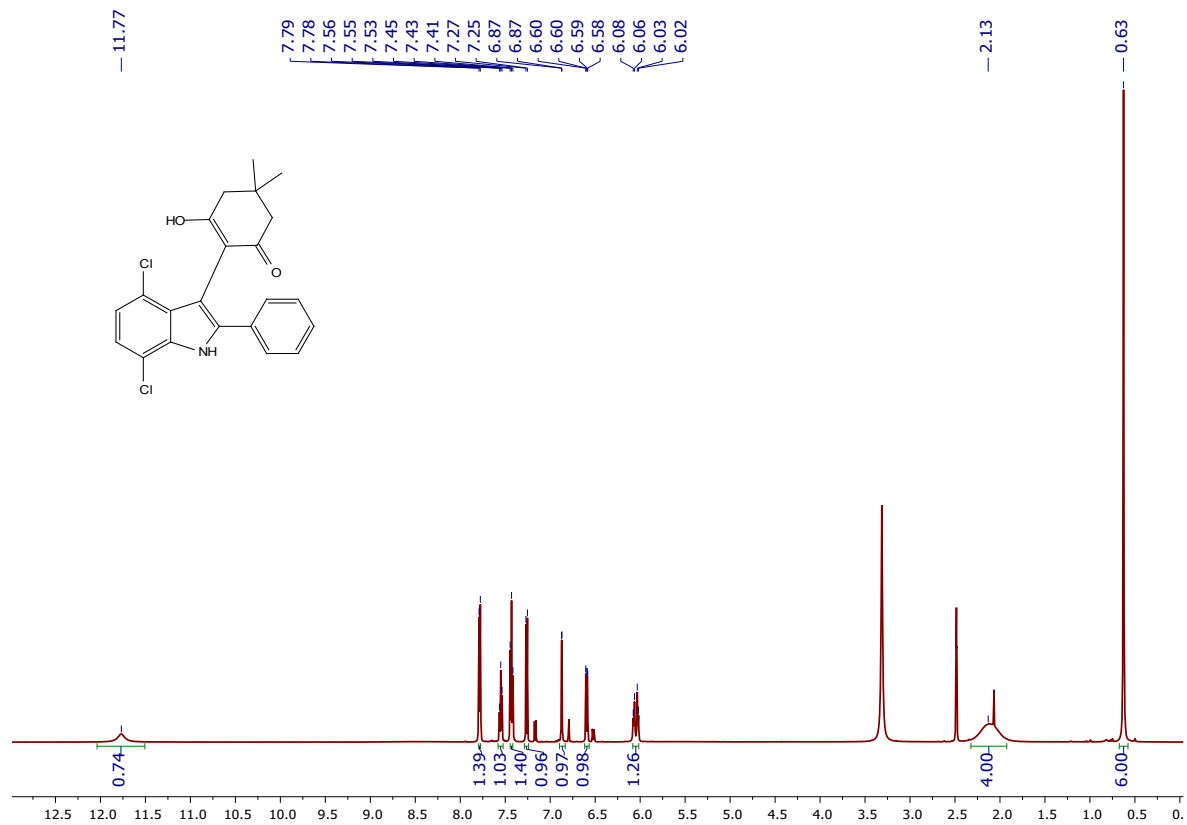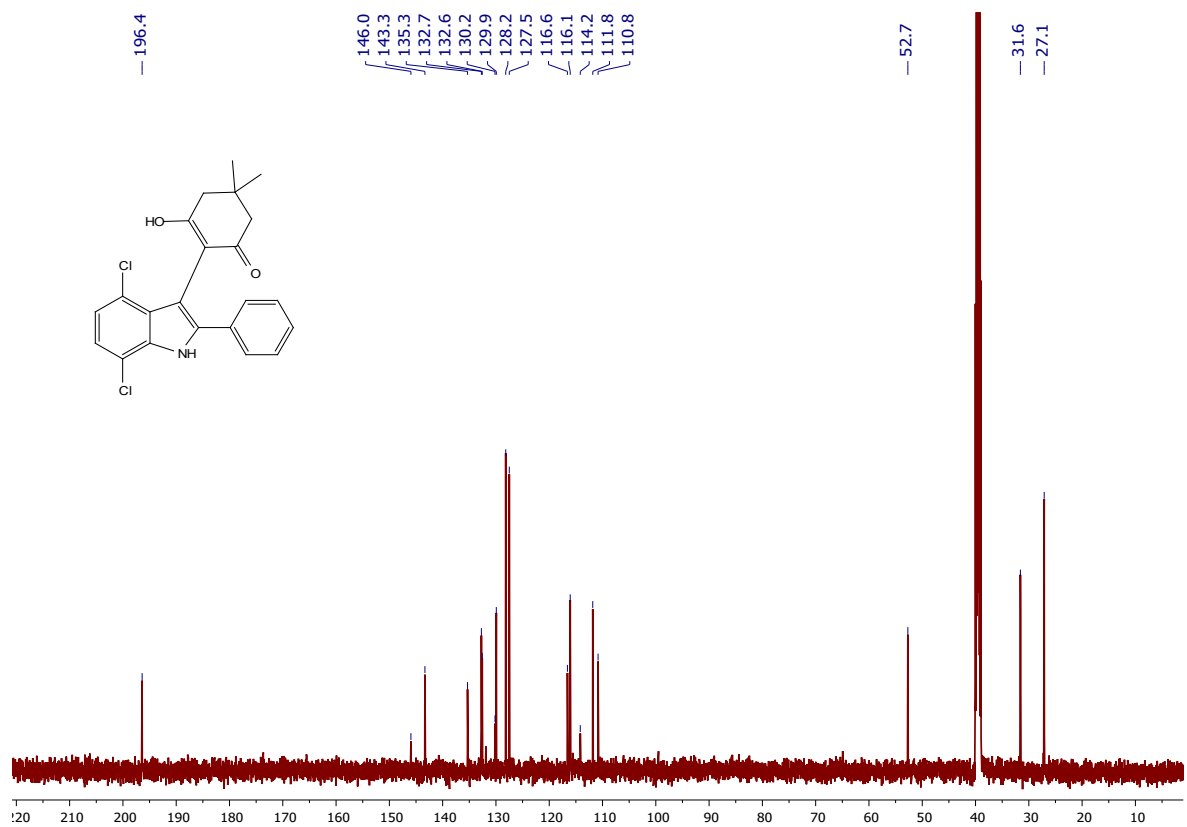

**$^1\text{H}$ ,  $^{13}\text{C}$  NMR spectrum of 2-(4-Chloro-7-nitro-2-phenyl-1*H*-indol-3-yl)-3-hydroxy-5,5-dimethylcyclohex-2-en-1-one (9c).**

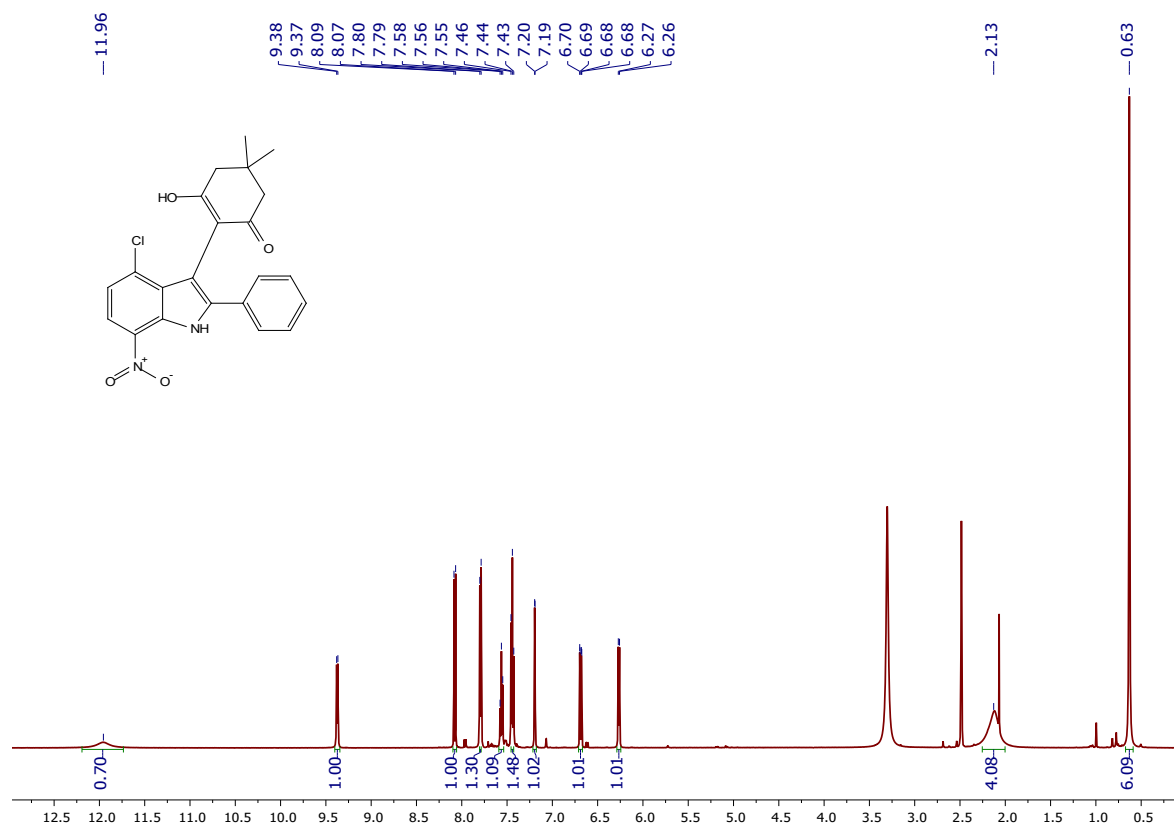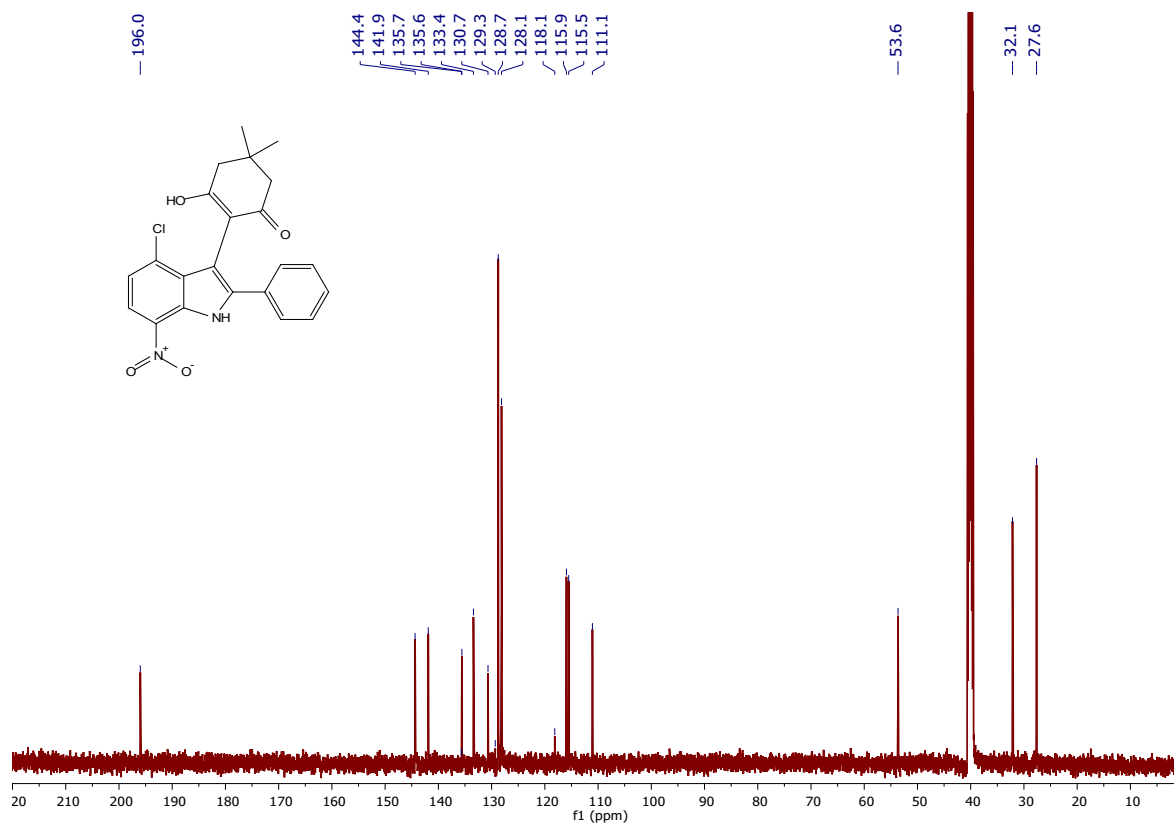

**$^1\text{H}$  NMR spectrum of 7,7-Dimethyl-1-phenyl-2,6,7,8-tetrahydro-3*H*-pyrrolo[3,4-*c*]quinoline-3,4,9(3*aH*,5*H*)-trione (10b)**

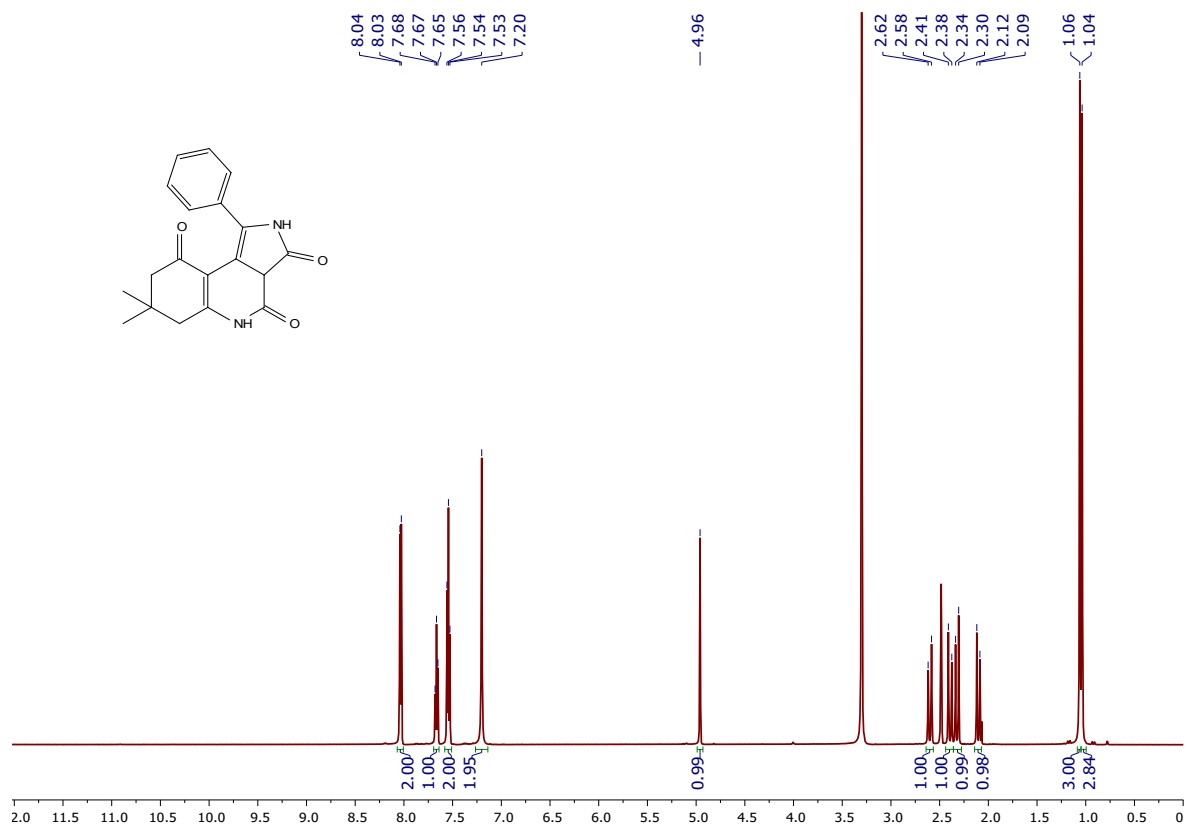

**$^1\text{H}$ ,  $^{13}\text{C}$  NMR spectrum of 2-Cyano-2-(4-oxo-1,2-diphenyl-4,5,6,7-tetrahydro-1H-indol-3-yl)acetamide (12a)**

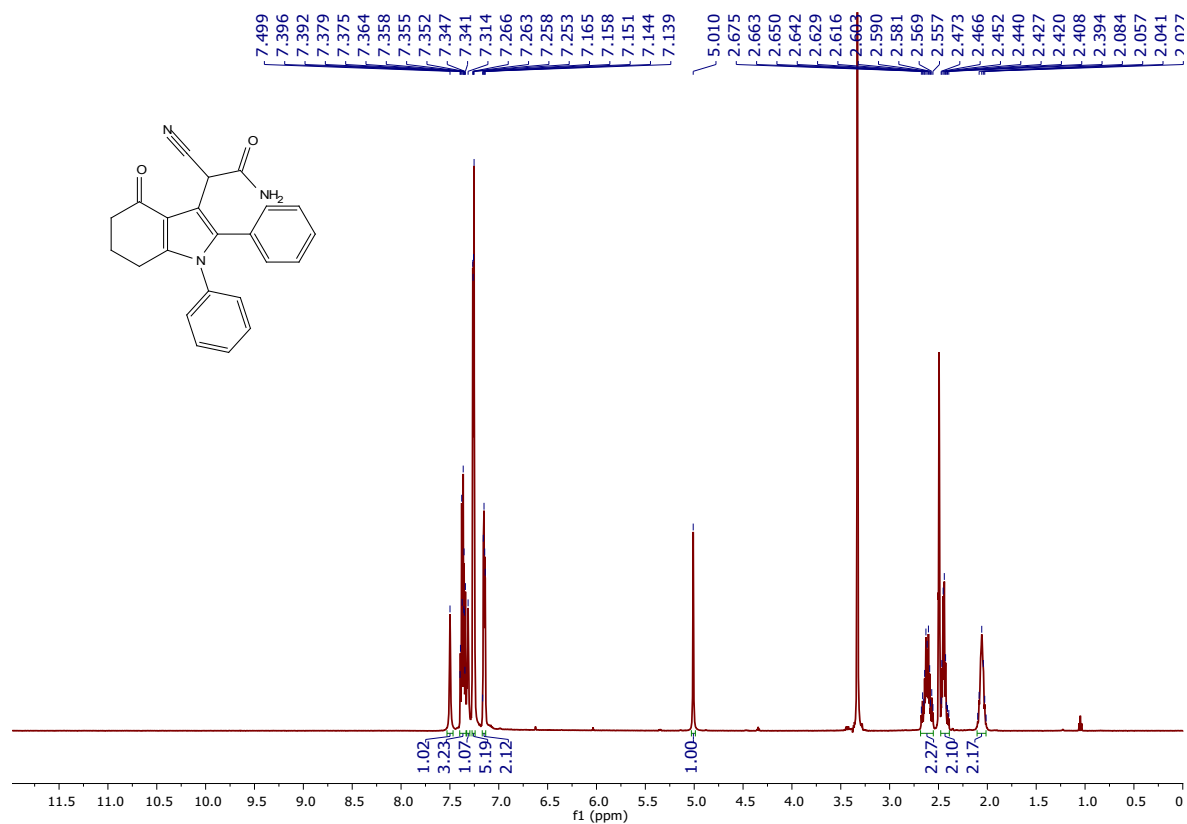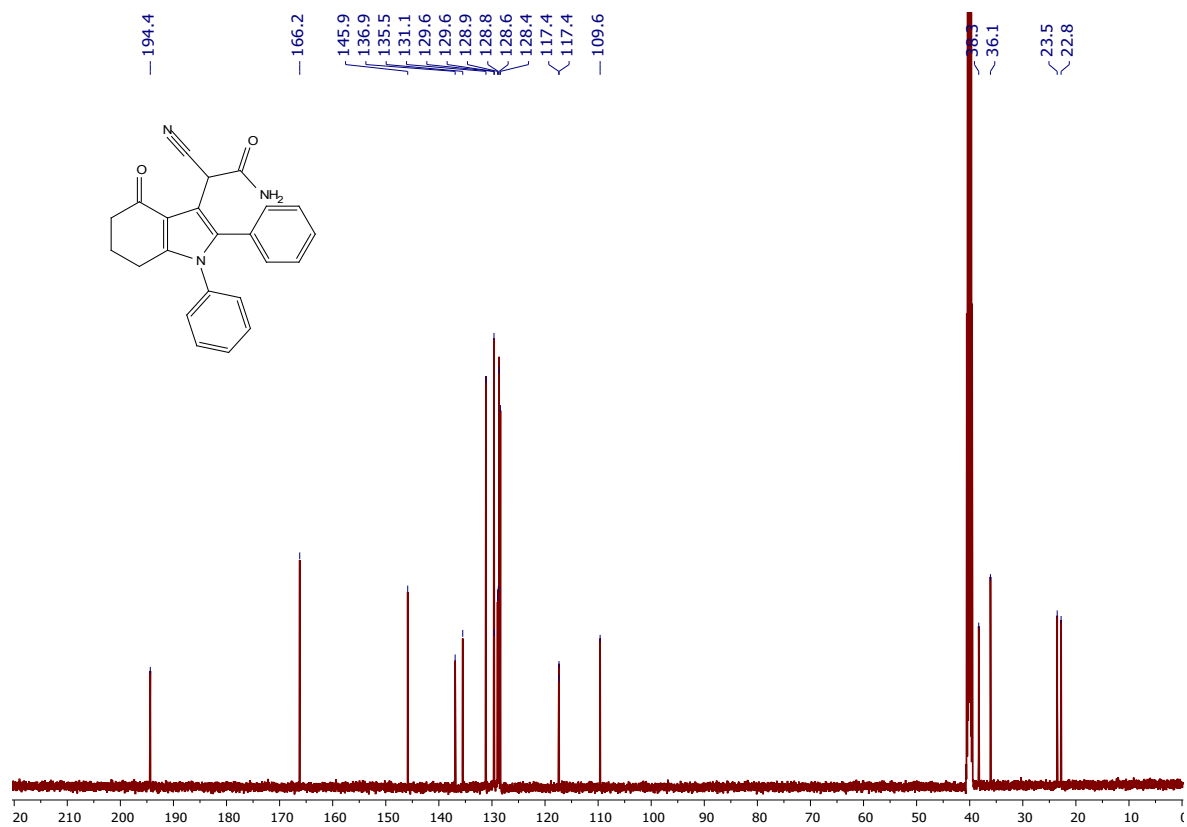

**$^1\text{H}$ ,  $^{13}\text{C}$  NMR spectrum of 2-Cyano-2-(4-oxo-2-phenyl-1-(*o*-tolyl)-4,5,6,7-tetrahydro-1*H*-indol-3-yl)acetamide (13a)**

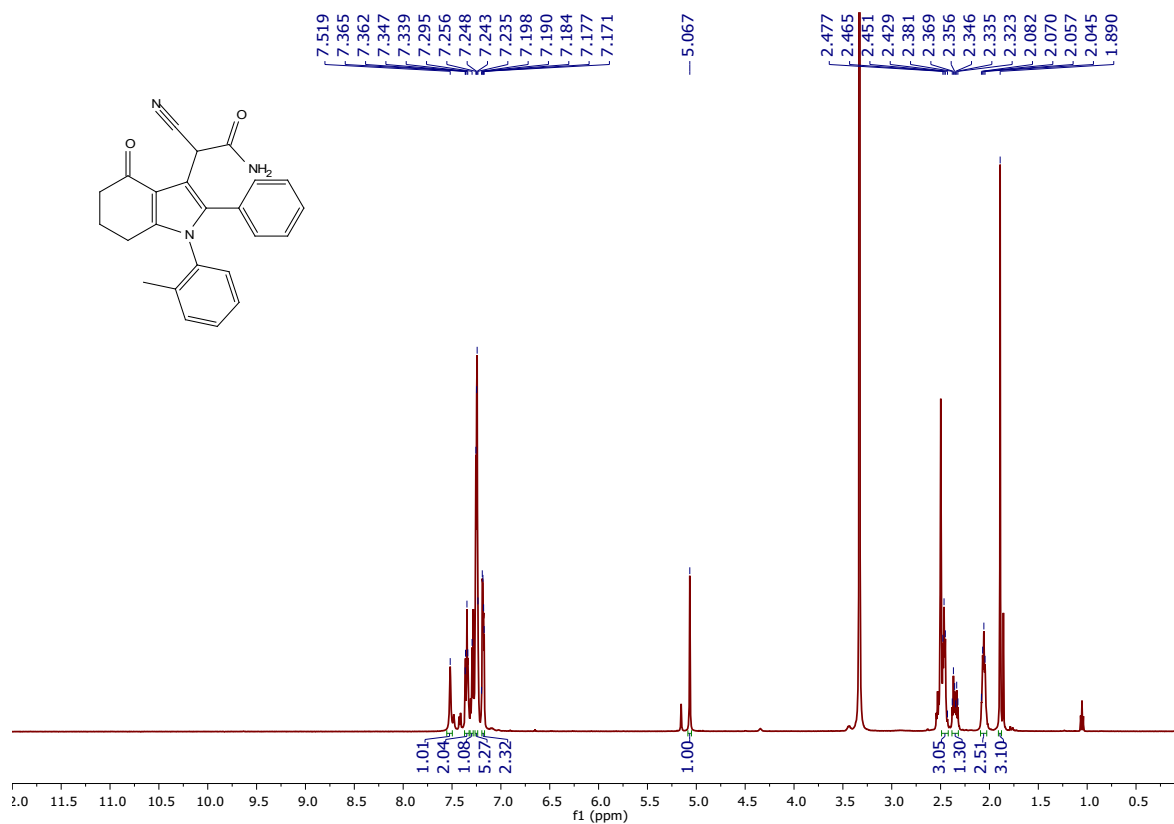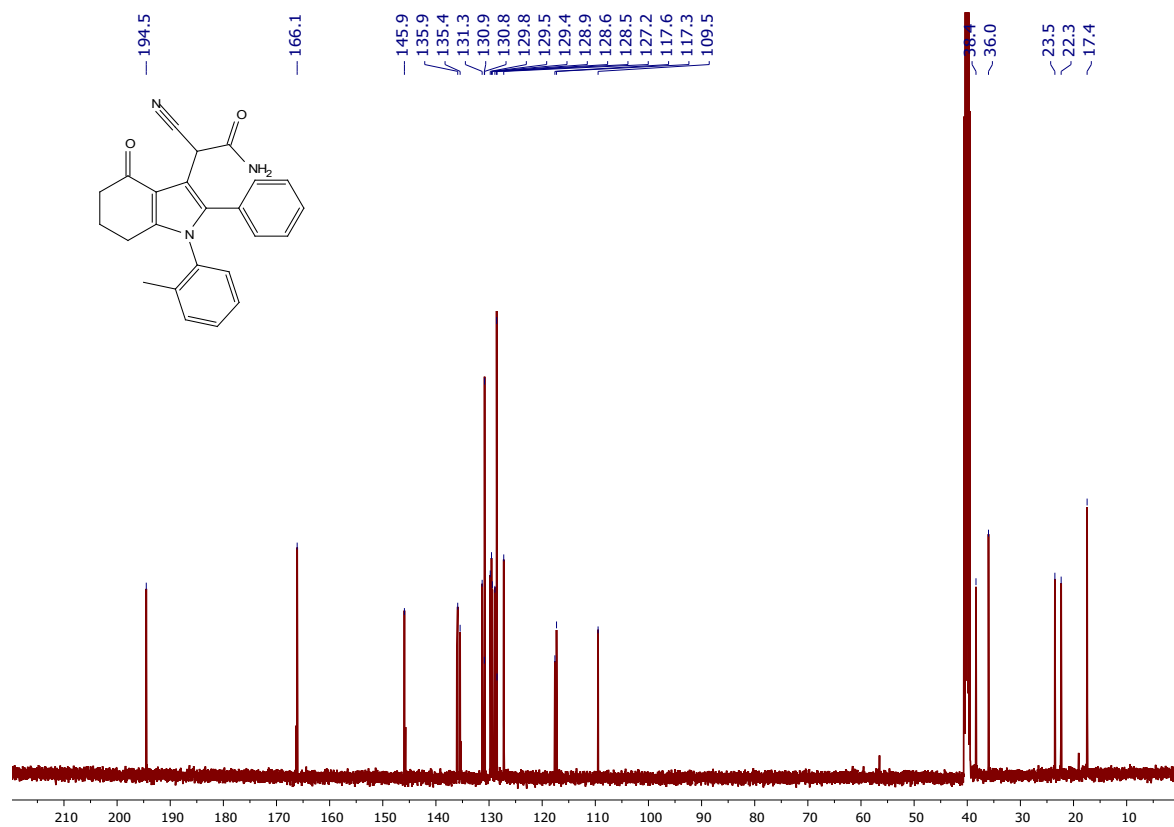

**$^1\text{H}$ ,  $^{13}\text{C}$  NMR spectrum of 2-Cyano-2-(1-(4-nitrophenyl)-4-oxo-2-phenyl-4,5,6,7-tetrahydro-1*H*-indol-3-yl)acetamide (14a).**

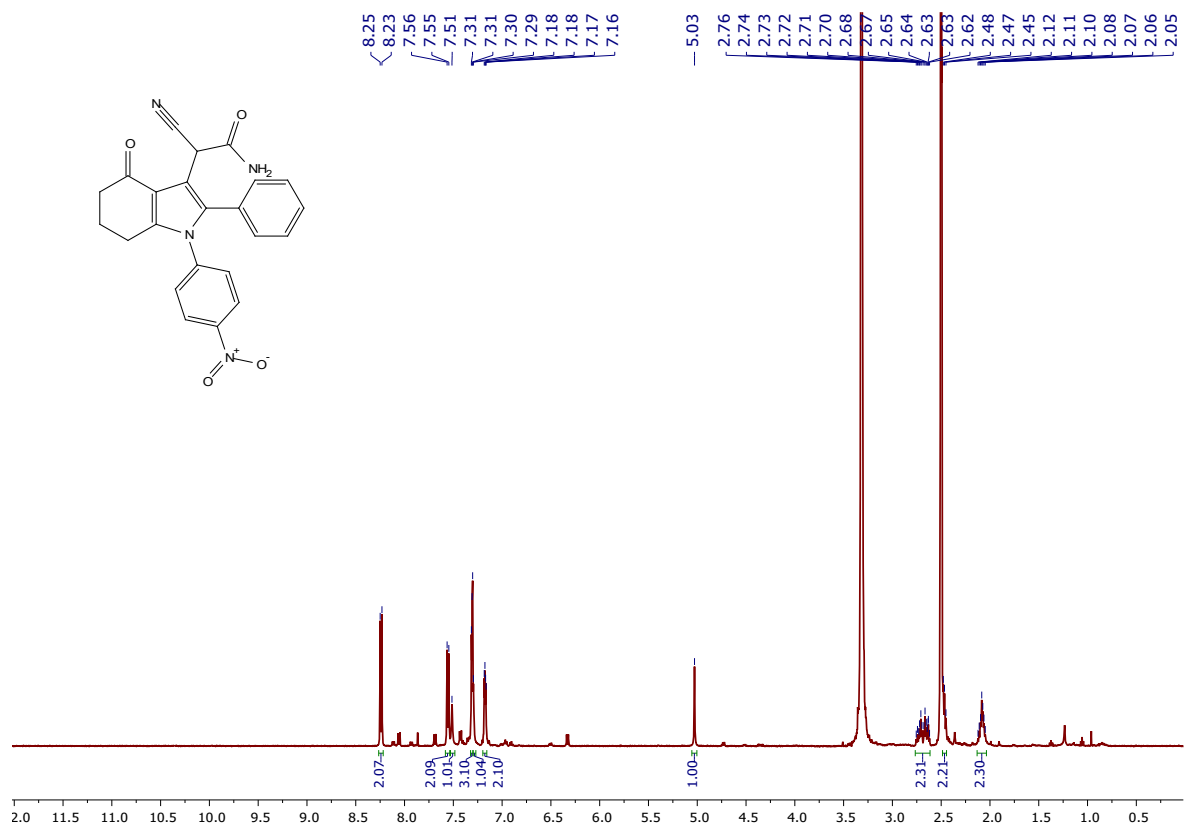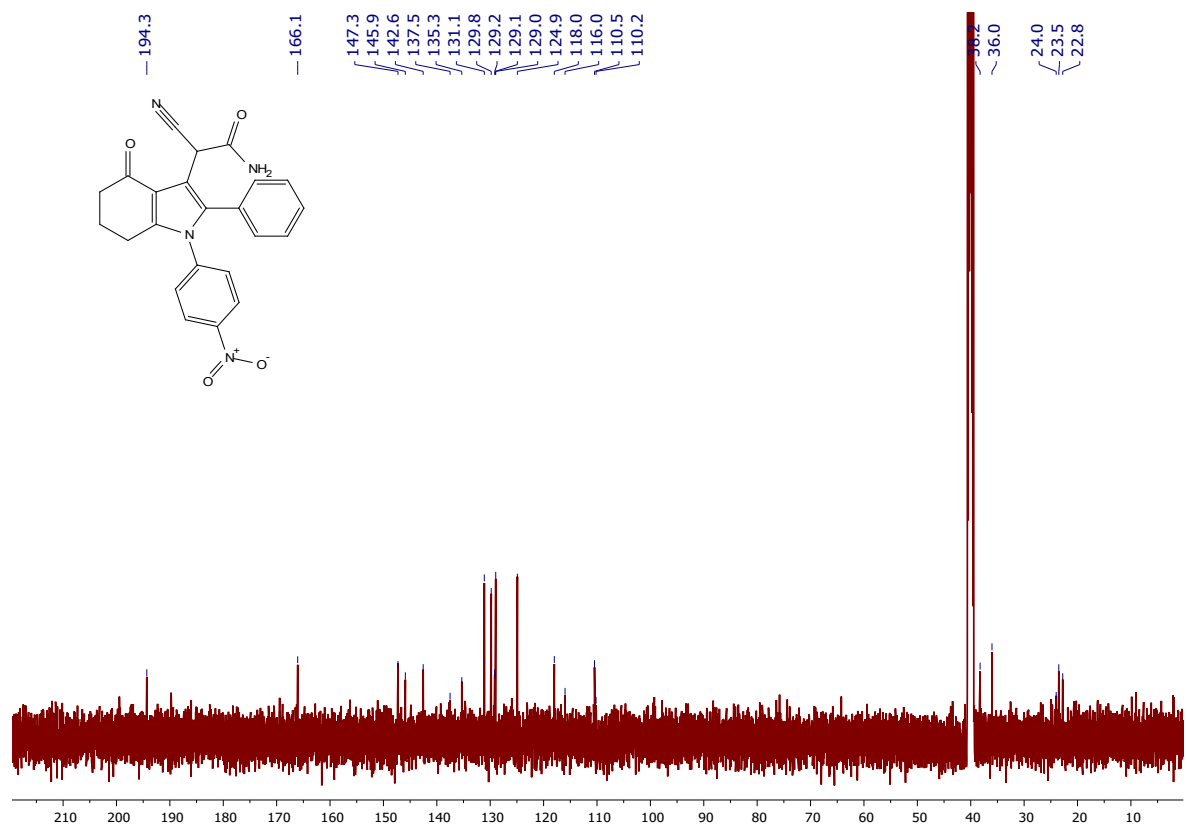

# Analysis Report

## Sample Information

|                |        |                    |                                               |
|----------------|--------|--------------------|-----------------------------------------------|
| Name           |        | Data File Path     | D:\MassHunter\Data\DP\20230425\T-NO2.d        |
| Sample ID      |        | Acq. Time (Local)  | 25/04/23 7:15:35 PM (UTC+07:00)               |
| Instrument     | LCQTOF | Method Path (Acq)  | D:\DP\DPTEST\DP-20230329.m                    |
| MS Type        | QTOF   | Version (Acq SW)   | 6200 series TOF/6500 series Q-TOF 10.1 (48.0) |
| Inj. Vol. (ul) | 2      | IRM Status         | Success                                       |
| Position       | P1-B1  | Method Path (DA)   |                                               |
| Plate Pos.     |        | Target Source Path |                                               |
| Operator       |        | Result Summary     |                                               |

## Sample Chromatograms

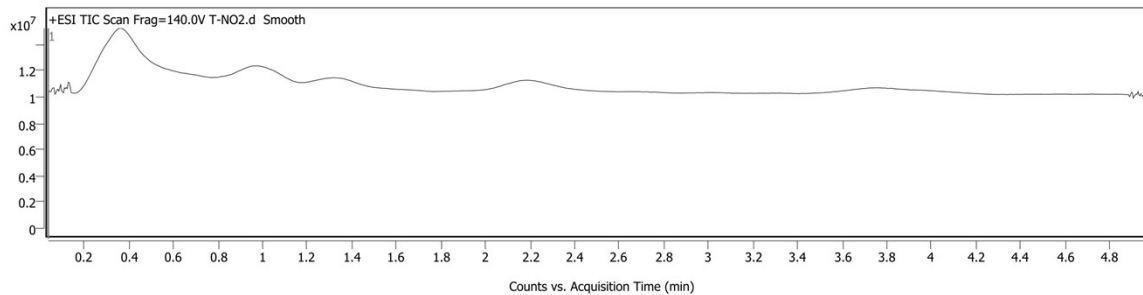

## Spectrum Plot Report

|                |         |              |               |            |         |                   |                                 |
|----------------|---------|--------------|---------------|------------|---------|-------------------|---------------------------------|
| Name           |         | Rack Pos.    |               | Instrument | LCQTOF  | Operator          |                                 |
| Inj. Vol. (ul) | 2       | Plate Pos.   |               | IRM Status | Success | Acq. Time (Local) | 25/04/23 7:15:35 PM (UTC+07:00) |
| Data File      | T-NO2.d | Method (Acq) | DP-20230329.m | Comment    |         |                   |                                 |

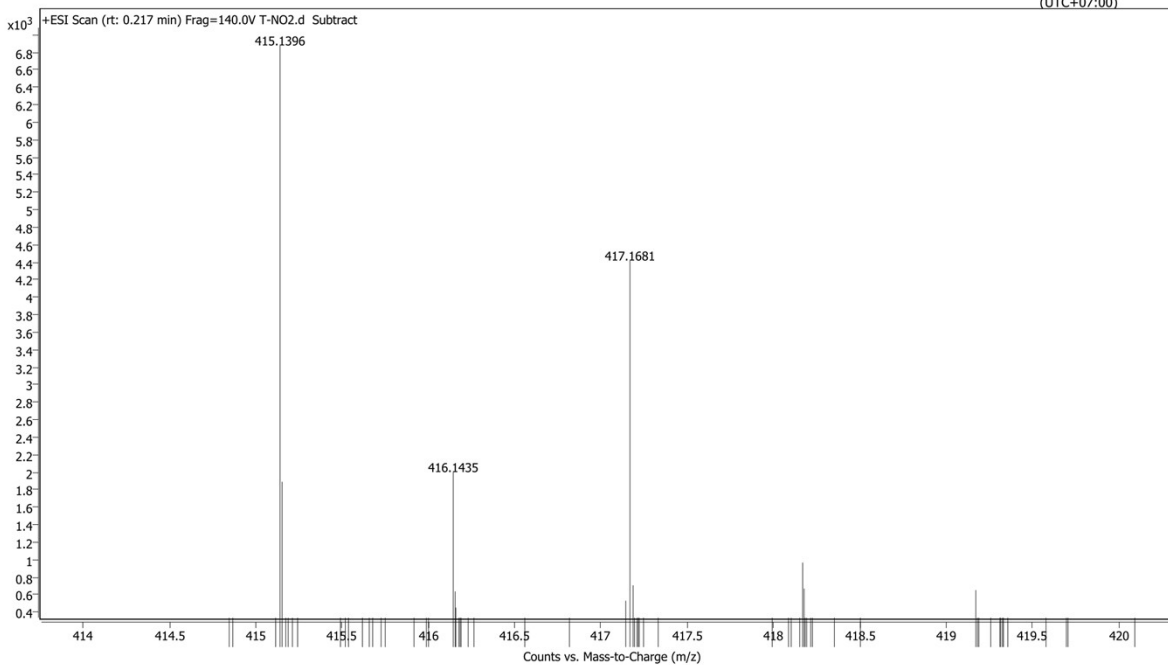



**$^1\text{H}$ ,  $^{13}\text{C}$  NMR spectrum of 2-Cyano-2-(1-(3,4-dichlorophenyl)-4-oxo-2-phenyl-4,5,6,7-tetrahydro-1*H*-indol-3-yl)acetamide (15a).**

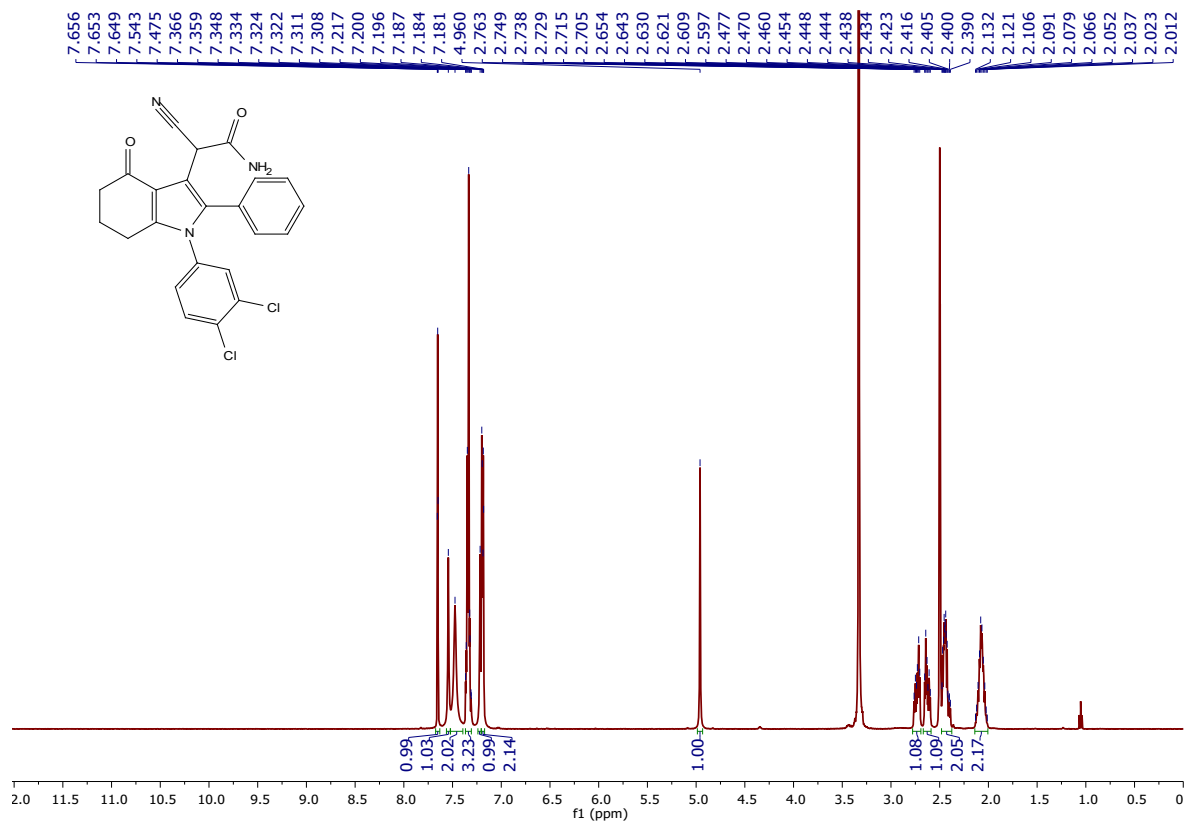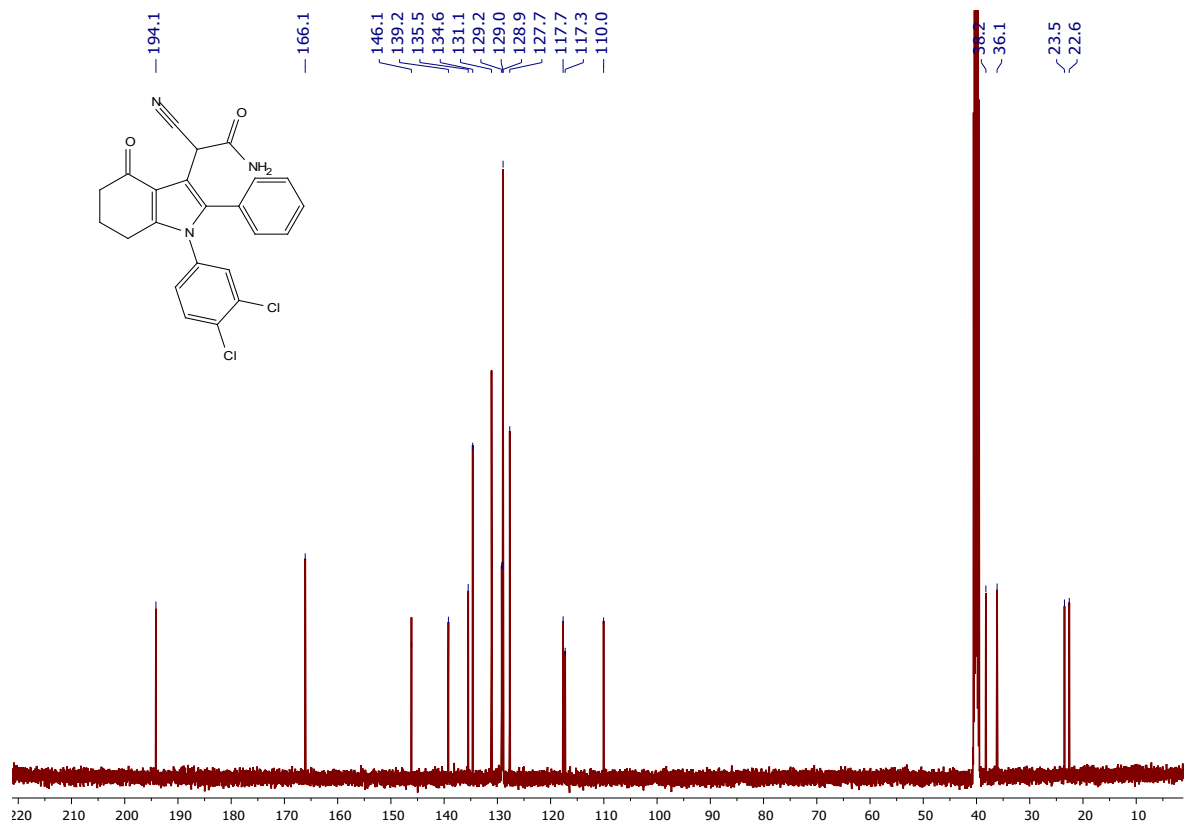

# Analysis Report

## Sample Information

|                       |        |                           |                                               |
|-----------------------|--------|---------------------------|-----------------------------------------------|
| <b>Name</b>           |        | <b>Data File Path</b>     | D:\MassHunter\Data\DP\20230425\T34CL.d        |
| <b>Sample ID</b>      |        | <b>Acq. Time (Local)</b>  | 25/04/23 8:20:14 PM (UTC+07:00)               |
| <b>Instrument</b>     | LCQTOF | <b>Method Path (Acq)</b>  | D:\DP\DPTEST\DP-20230329.m                    |
| <b>MS Type</b>        | QTOF   | <b>Version (Acq SW)</b>   | 6200 series TOF/6500 series Q-TOF 10.1 (48.0) |
| <b>Inj. Vol. (ul)</b> | 2      | <b>IRM Status</b>         | All ions missed                               |
| <b>Position</b>       | P1-C1  | <b>Method Path (DA)</b>   |                                               |
| <b>Plate Pos.</b>     |        | <b>Target Source Path</b> |                                               |
| <b>Operator</b>       |        | <b>Result Summary</b>     |                                               |

## Sample Chromatograms

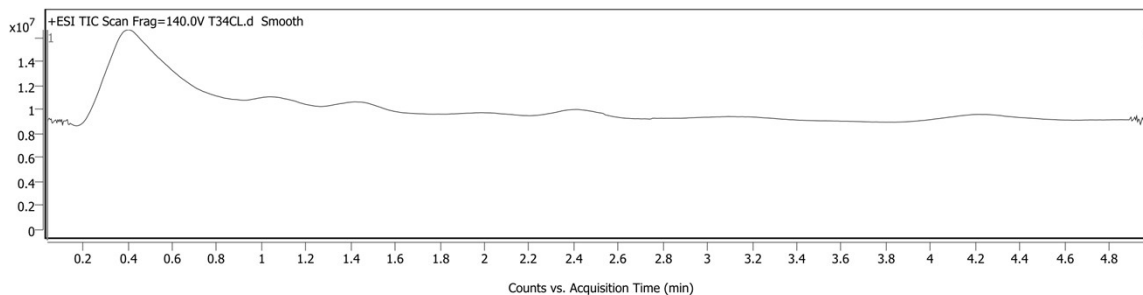

## Spectrum Plot Report

|                       |         |                     |               |                   |                 |                          |                                 |
|-----------------------|---------|---------------------|---------------|-------------------|-----------------|--------------------------|---------------------------------|
| <b>Name</b>           |         | <b>Rack Pos.</b>    |               | <b>Instrument</b> | LCQTOF          | <b>Operator</b>          |                                 |
| <b>Inj. Vol. (ul)</b> | 2       | <b>Plate Pos.</b>   |               | <b>IRM Status</b> | All ions missed | <b>Acq. Time (Local)</b> | 25/04/23 8:20:14 PM (UTC+07:00) |
| <b>Data File</b>      | T34CL.d | <b>Method (Acq)</b> | DP-20230329.m | <b>Comment</b>    |                 |                          |                                 |

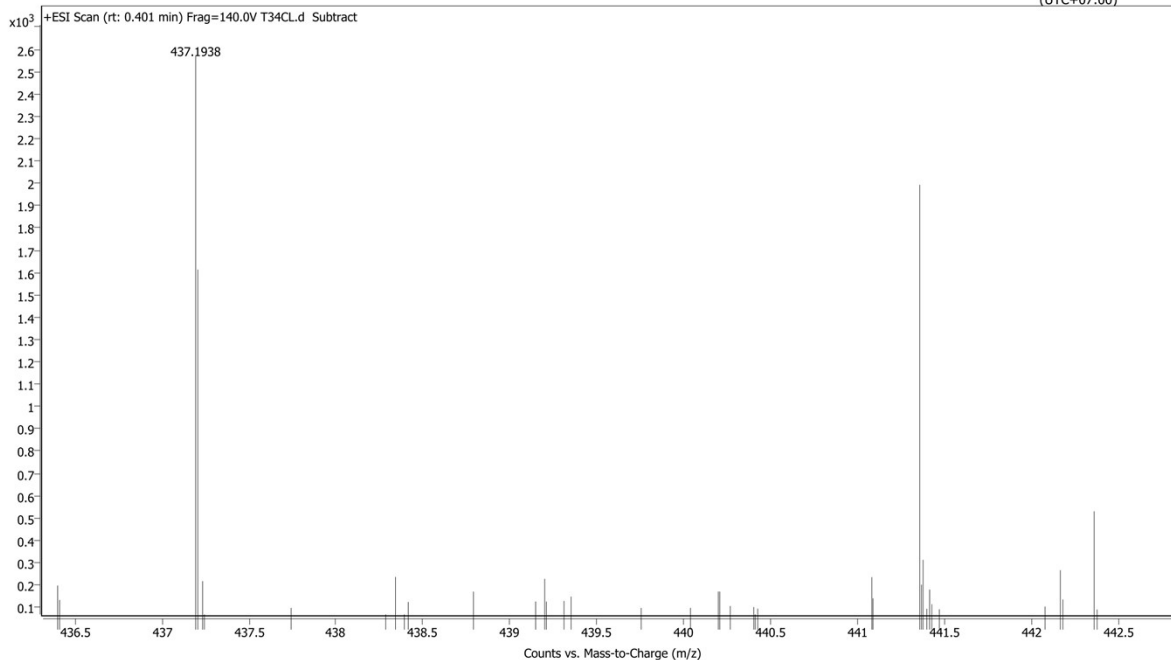

Supplement: d3nj01948a1.pdf [file d3nj01948a1.pdf]
